# Supplementary material for: Metabolic oscillations on the circadian time scale in Drosophila cells lacking clock genes
Source: PubMed Central journal article supplement (PMC6078164; doi:10.15252/msb.20188376), 2018-08-06
Supplement: MSB-14-e8376-s001.pdf [file MSB-14-e8376-s001.pdf]

# **Appendix: Metabolic oscillations on the circadian time scale in *Drosophila* cells lacking clock genes**

Guillaume Rey<sup>1\*#</sup>, Nikolay B. Milev<sup>1#</sup>, Utham K. Valekunja<sup>1</sup>, Ratnasekhar Ch<sup>1,2</sup>, Sandipan Ray<sup>1,2</sup>, Mariana Silva Dos Santos<sup>1</sup>, Andras D. Nagy<sup>1</sup>, Robin Antrobus<sup>3</sup>, James I. MacRae<sup>1</sup>, and Akhilesh B. Reddy<sup>1\*</sup>

<sup>1</sup> The Francis Crick Institute, 1 Midland Road, London NW1 1AT, UK.

<sup>2</sup> UCL Institute of Neurology, Queen Square, London WC1N 3BG, UK.

<sup>3</sup> Cambridge Institute for Medical Research (CIMR), Wellcome Trust/MRC Building, Addenbrooke's Hospital, Cambridge CB2 0XY, UK.

## **Table of contents**

**Appendix Figure S1. RNA-Seq data analysis.**

**Appendix Figure S2. Cell cycle analyses in S2 cells.**

**Appendix Figure S3. RNA-Seq time course at 28°C and temperature compensation.**

**Appendix Figure S4. Proteomics data analysis.**

**Appendix Figure S5. Integration of transcriptomics and proteomics data.**

**Appendix Figure S6. Metabolomics data analysis.**

**Appendix Figure S7. Coupled gene expression and metabolic cycles in *Drosophila* S2 cells.**

**Appendix Table S1. Table of the 70 MS2-annotated features.**

**Appendix Table S2. Table of the 20 metabolites selected for targeted LC-MS analysis.**

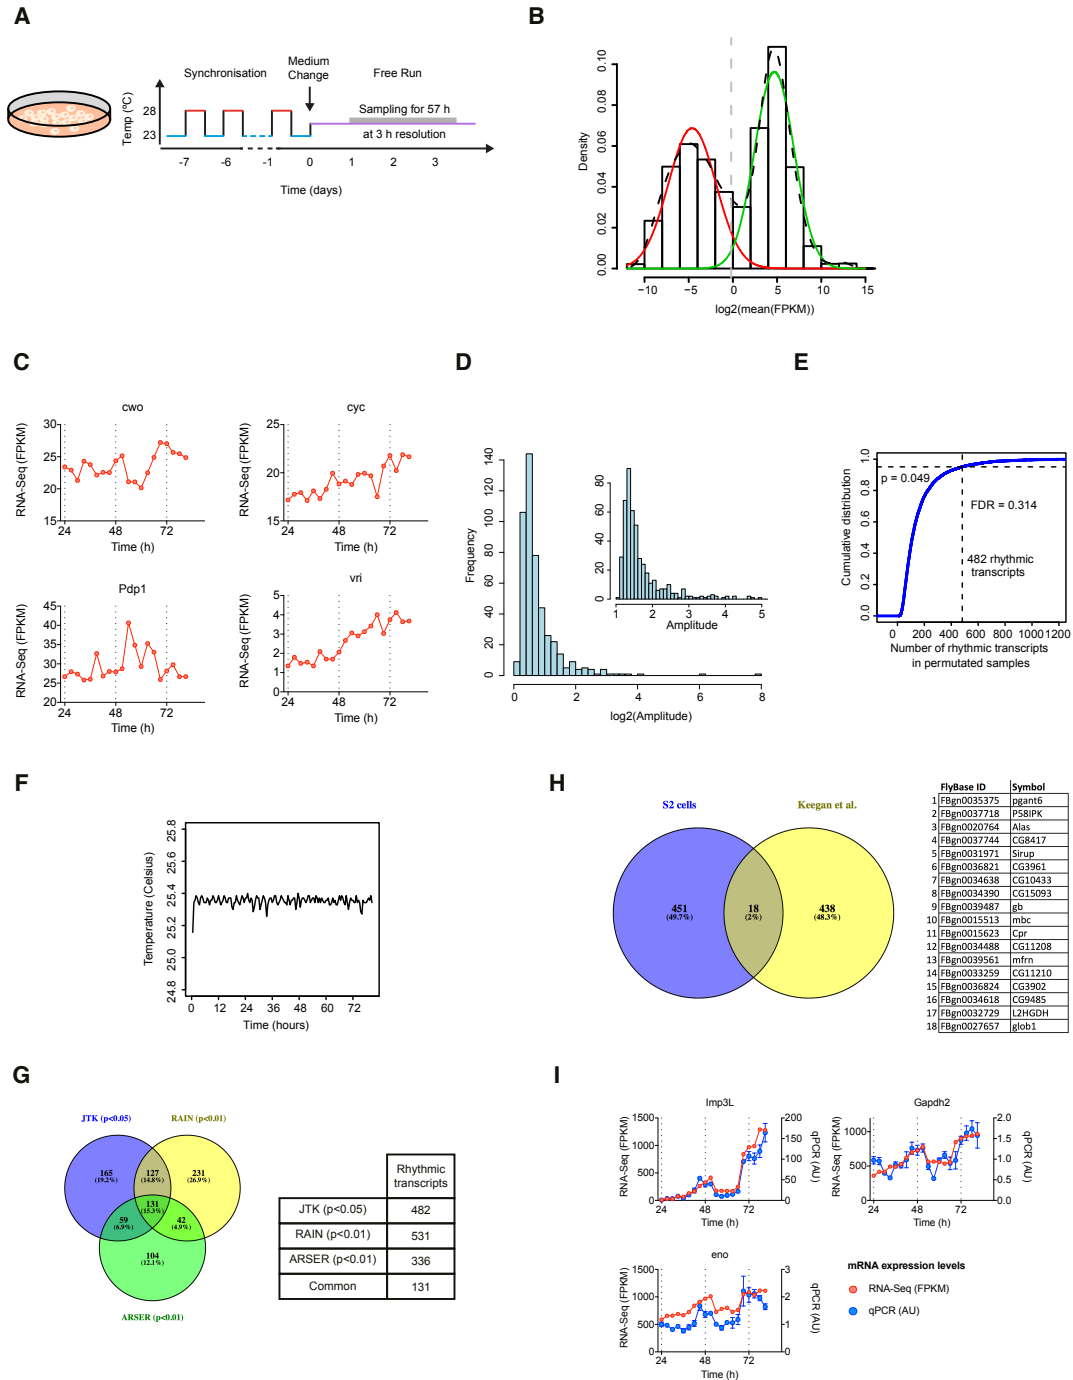

**Appendix Figure S1. RNA-Seq data analysis.**

**A**, Schematic showing the entrainment protocol used to synchronize *Drosophila* S2 cells. **B**, Histogram showing the distribution of mean expression levels measured by RNA-Seq. The distribution was modelled with a mixture model to define the sets of low (red) and highly (green) expressed transcripts. The dashed vertical line represents the cut-off chosen to define the set of expressed transcripts. FPKM, Fragments Per Kilobase of transcript per Million mapped reads. **C**, mRNA expression of four canonical circadian expressed in S2 cells. **D**, Distribution of amplitudes of

the 482 rhythmic transcripts. Amplitudes were calculated by taking the ratio between the maximum and the minimum of each transcript profile. Insert: zoomed version of the plot with a natural scale on the x-axis. **E**, Estimation of FDR using permutation tests. The cumulative distribution of the number of rhythmic transcripts in the 10,000 permutations is shown together with the empirical p-value and estimated FDR. **F**, Temperature recordings inside the incubator chamber show that the temperature is stable and not oscillating during the free-run phase. **G**, Comparison of the JTK-Cycle algorithm with two other methods to detect rhythmic transcripts. A table giving the number of rhythmic transcripts is given (left), together with a Venn diagram showing the overlap between methods (right). **H**, Overlap between the 482 rhythmic transcripts found in the study and the set of 456 rhythmic transcripts compiled from 5 microarray studies (Keegan *et al*, 2007). **I**, Validation of selected transcripts by quantitative PCR (qPCR) (n = 3, mean  $\pm$  SEM).

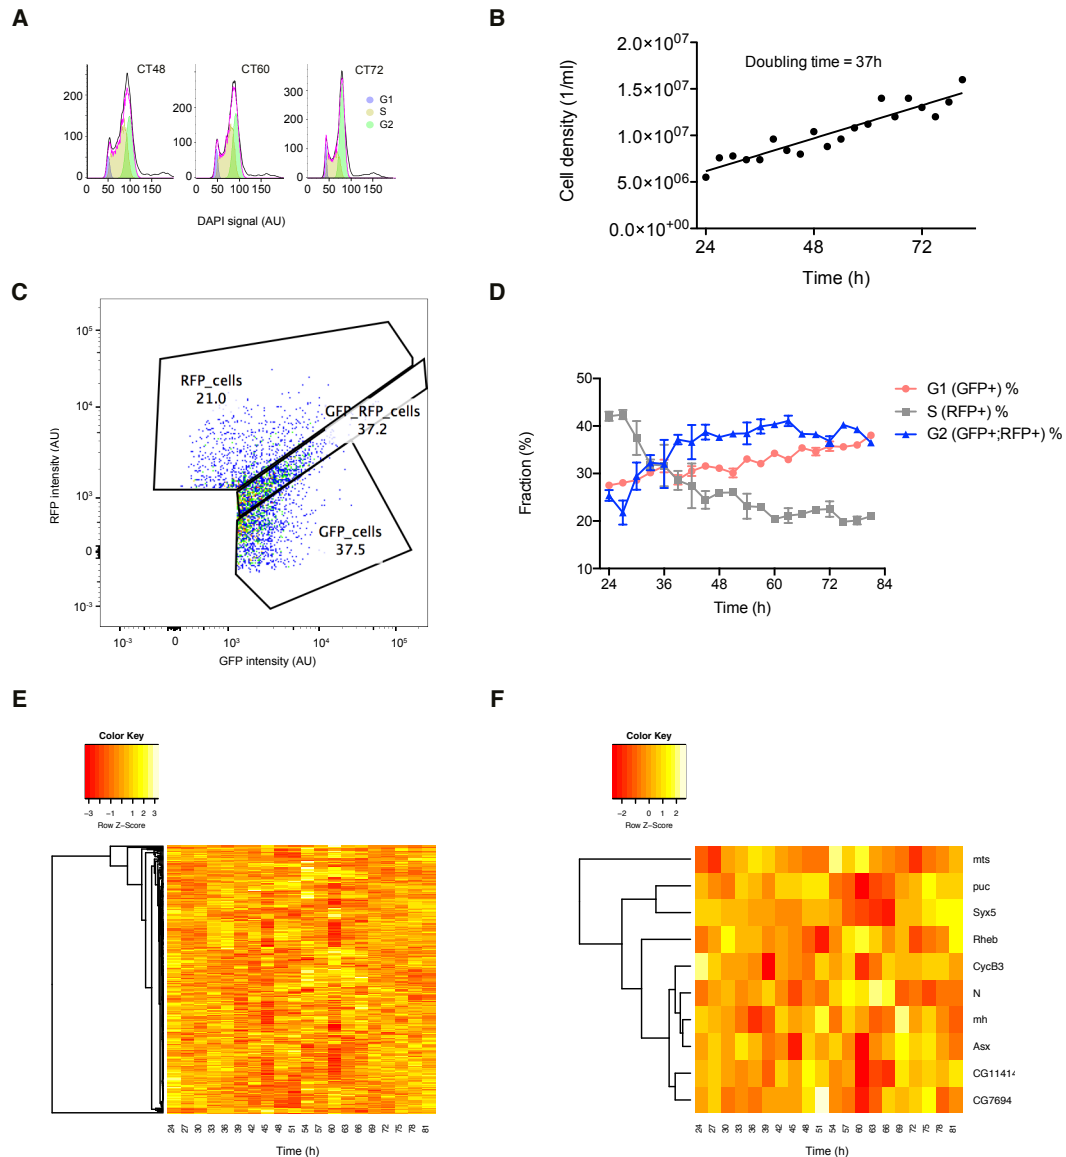

### Appendix Figure S2. Cell cycle analyses in S2 cells.

**A**, Representative histograms of the DAPI signal at selected time points, with the curve fitting of cell cycle phases. **B**, Cell density of S2 cells during the time course experiment is shown, together with the estimated double time. **C**, Representative image from the flow cytometry analysis of Fly-FUCCI S2 cells showing the windows used to define GFP and RFP positive cells. **D**, Cell cycle analysis of Fly-FUCCI S2 cells using flow cytometry showing the fraction of cells in G1, S and G2 phases over a time course experiment (n = 3 per time-point, mean ± SEM). **E**, Heatmap representation of transcripts with mitotic cell cycle GO annotation from the 25°C transcriptomics experiment. **F**, Heatmap representation of rhythmic transcripts with mitotic cell cycle GO annotation from the 25°C transcriptomics experiment.

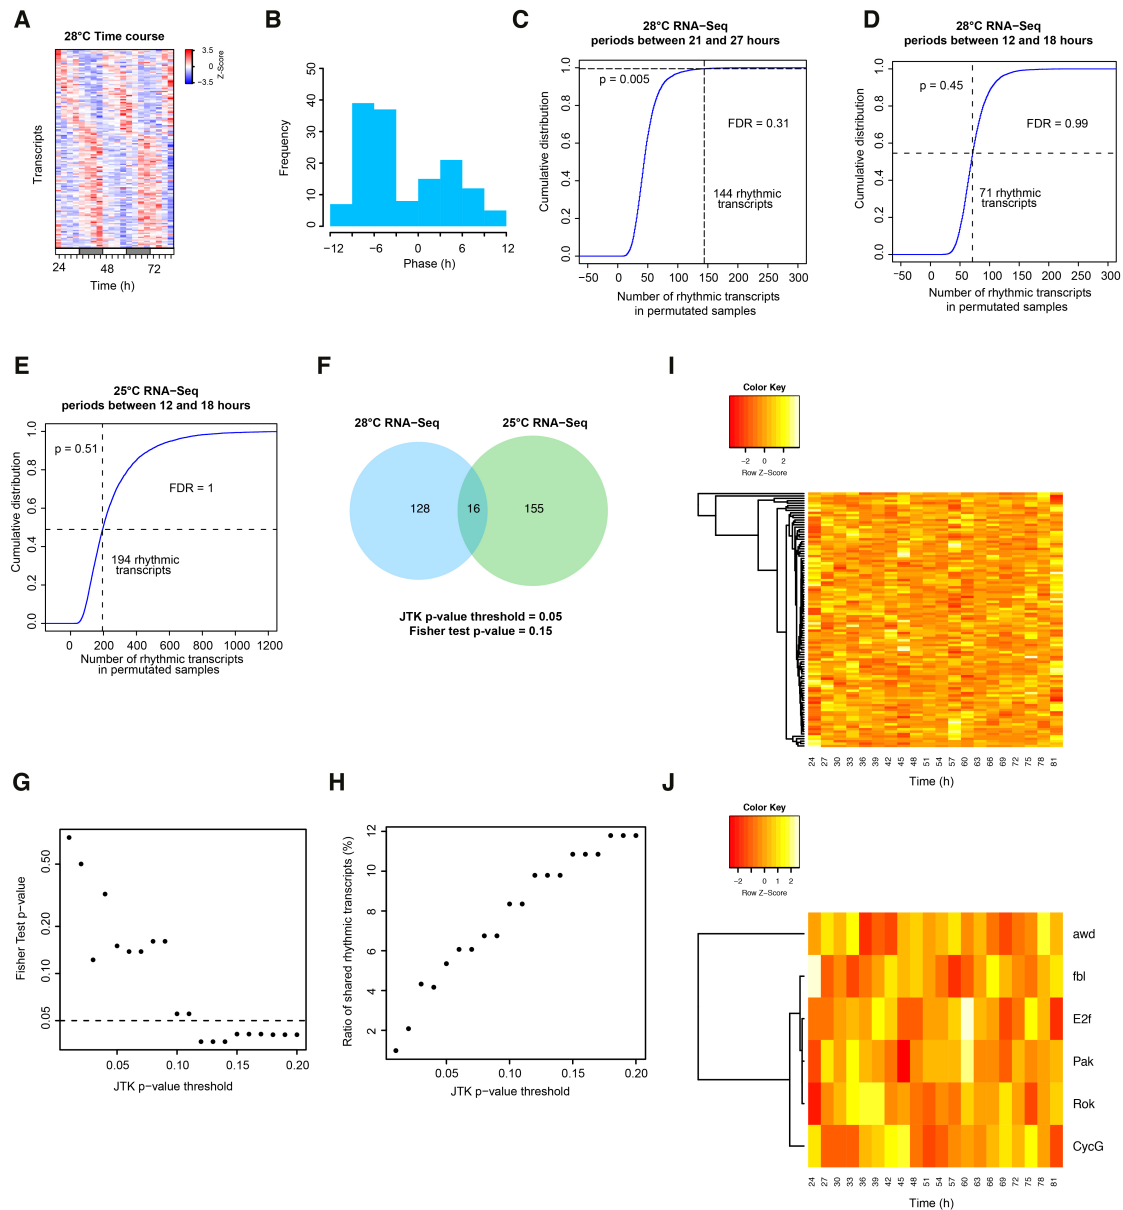

**Appendix Figure S3. RNA-Seq time course at 28°C and temperature compensation.**

**A**, Heatmap showing the expression profiles of the 144 rhythmic transcripts (JTK-Cycle,  $p < 0.05$ ,  $FDR=0.31$ ) **B**, Distribution of phase of the circadian transcripts shown in **A**. **C**, **D** Estimation of FDR using permutation tests for JTK analyses for periods of 21-27h (**C**) and 12-18h (**D**). The cumulative distribution of the number of rhythmic transcripts in the 10,000 permutations is shown together with the empirical p-value and estimated FDR. **E**, Estimation of FDR for JTK analyses for periods 12-18h in the 25°C experiment. **F**, Overlap between rhythmic transcripts detected at 25°C and 28°C shown with a Venn diagram. **G**, Statistical significance of the overlap between rhythmic transcripts detected at 25°C and 28°C as a function of the threshold of the JTK algorithm. **H**, Ratio of shared rhythmic transcripts ( $\#$  of shared rhythmic transcripts)/( $\#$  of rhythmic transcripts detected in either experiment), as a function of the threshold of the JTK algorithm. **I**, Heatmap representation of transcripts with mitotic cell cycle GO annotation from the 28°C transcriptomics

experiment. **J**, Heatmap representation of rhythmic transcripts with mitotic cell cycle GO annotation from the 28°C transcriptomics experiment.

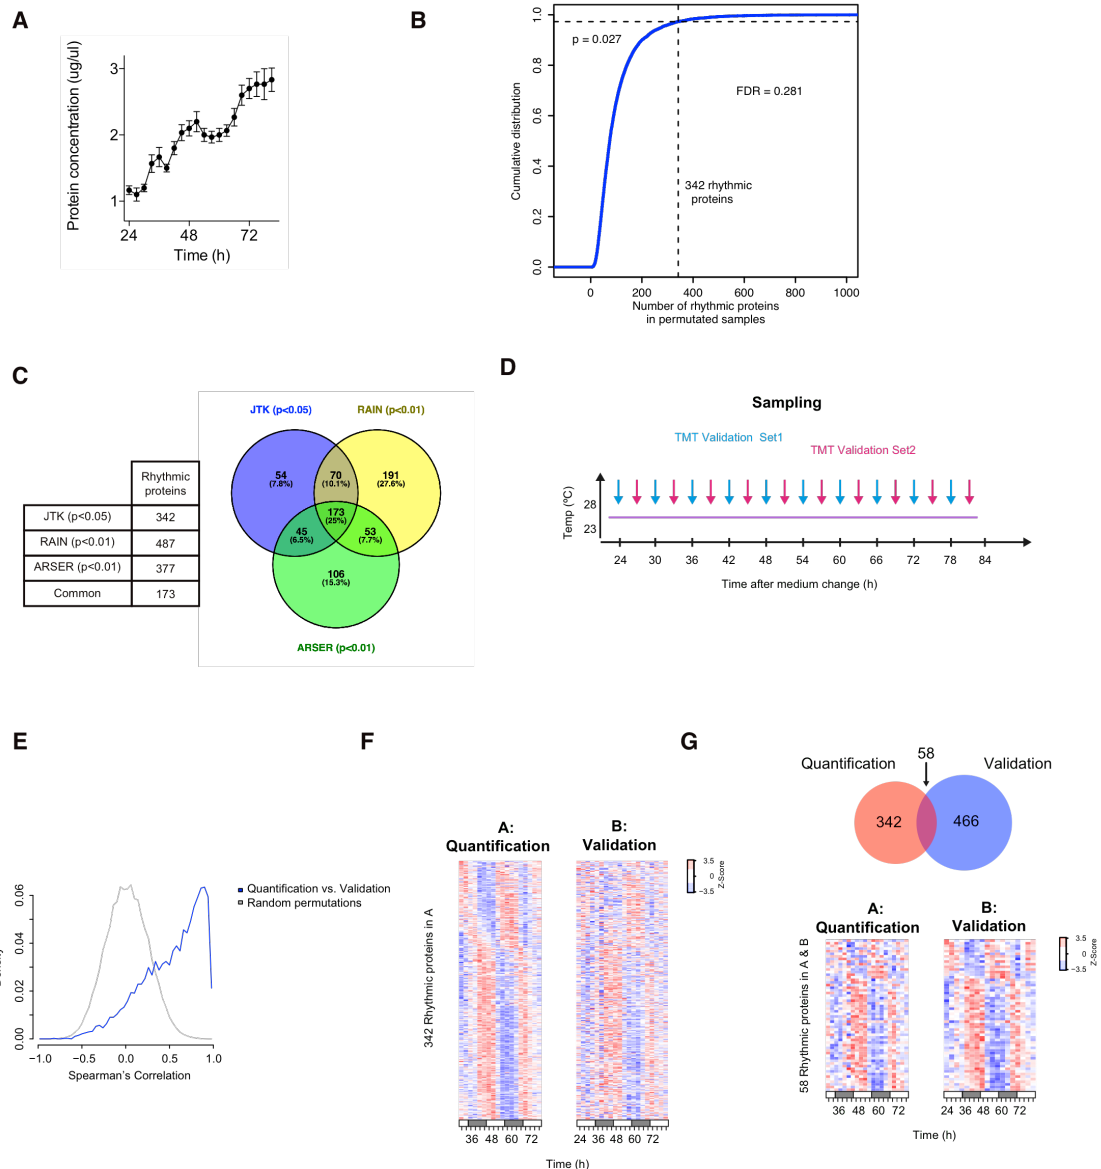

### Appendix Figure S4. Proteomics data analysis.

**A**, Protein concentration in cell extracts as measured by the BCA method (mean  $\pm$  SEM,  $n = 2-3$ ). **B**, Estimation of FDR using permutation tests. The cumulative distribution of the number of rhythmic proteins in the 10,000 permutations is shown together with the empirical  $p$ -value and estimated FDR. **C**, Validation of the JTK-Cycle algorithm with two other methods to detect rhythmic transcripts. A table giving the number of rhythmic transcripts is given (left), together with a Venn diagram showing the overlap between methods (right). **D**, Cartoon representing the labelling scheme for the validation protocol. Samples were labelled using interspersed time points (Set 1: CT24, CT30, CT36, ...; Set 2: CT27, CT33, CT39, ...) and the two 10plex TMTs were then combined to produce 20 time point quantification profiles. **E**, Distributions of Spearman's correlation coefficient between the quantification and validation sets of quantitative proteomics data. Random permutations of the data are shown as control ( $n = 100$ ). **F**, Heatmap representation of the proteins detected as rhythmic in the



quantification set (342 proteins) for the quantification set (left) and validation set (right). **G**, Heatmap representation of the proteins detected as rhythmic in both the quantification and validation sets (58 proteins) for the quantification set (left) and validation set (right).

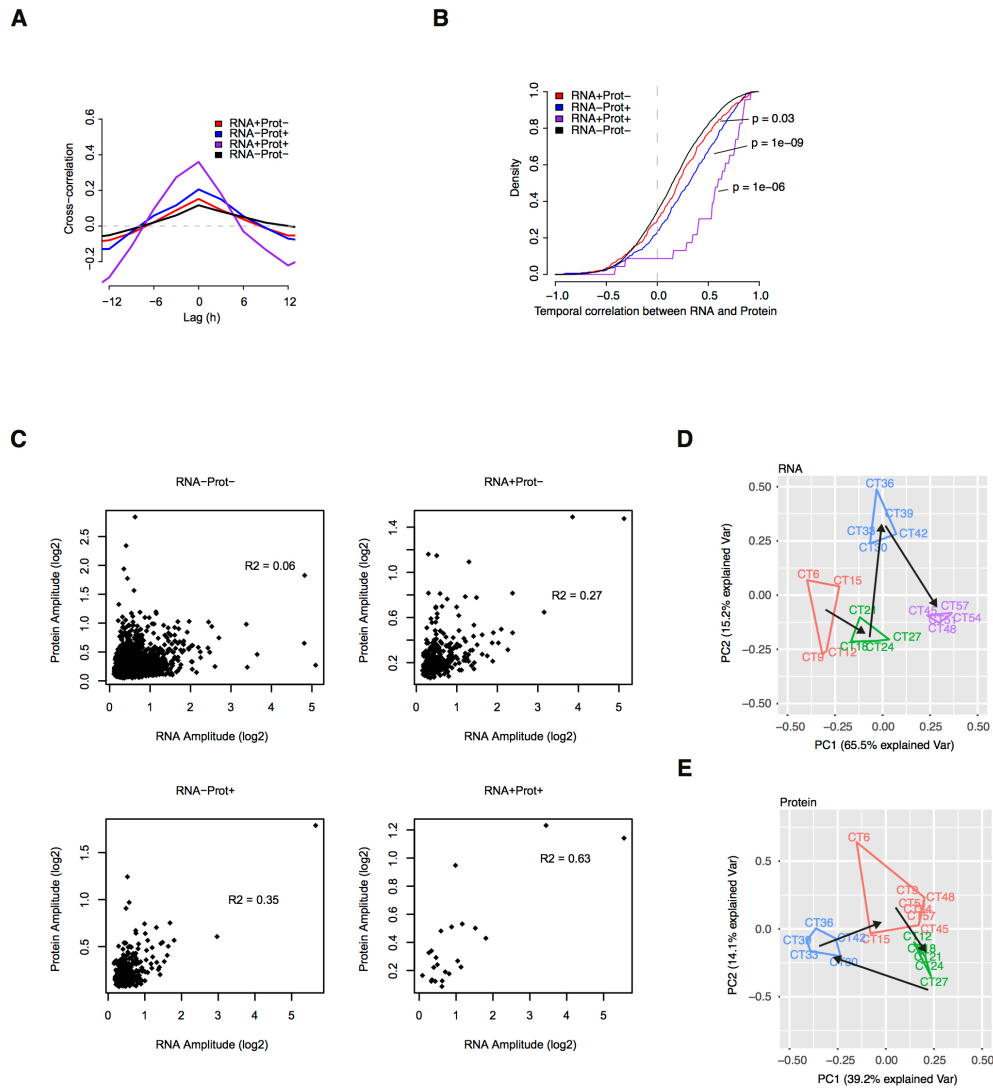

### Appendix Figure S5. Integration of transcriptomics and proteomics data.

**A**, Temporal cross-correlation for RNA-proteins pairs as described in Figure 3. **B**, Cumulative distributions of Pearson correlation coefficients for the indicated groups of RNA-protein pairs for detrended profiles. RNA-Prot-, neither circadian; RNA+Prot+, both circadian; RNA-Prot+, RNA not circadian and protein circadian; RNA+Prot-, RNA circadian and protein not circadian (Wilcoxon sum rank test). **C**, Scatterplot of amplitude at the transcript and protein levels for the 4 sets of RNA-protein pairs. The coefficient of determination of the linear regression is shown for each comparison. **D**, **E**, PCA plot of RNA and protein data for all RNA-proteins pairs. Clustering of time points is performed with Partitioning Around Medoids (PAM) method.

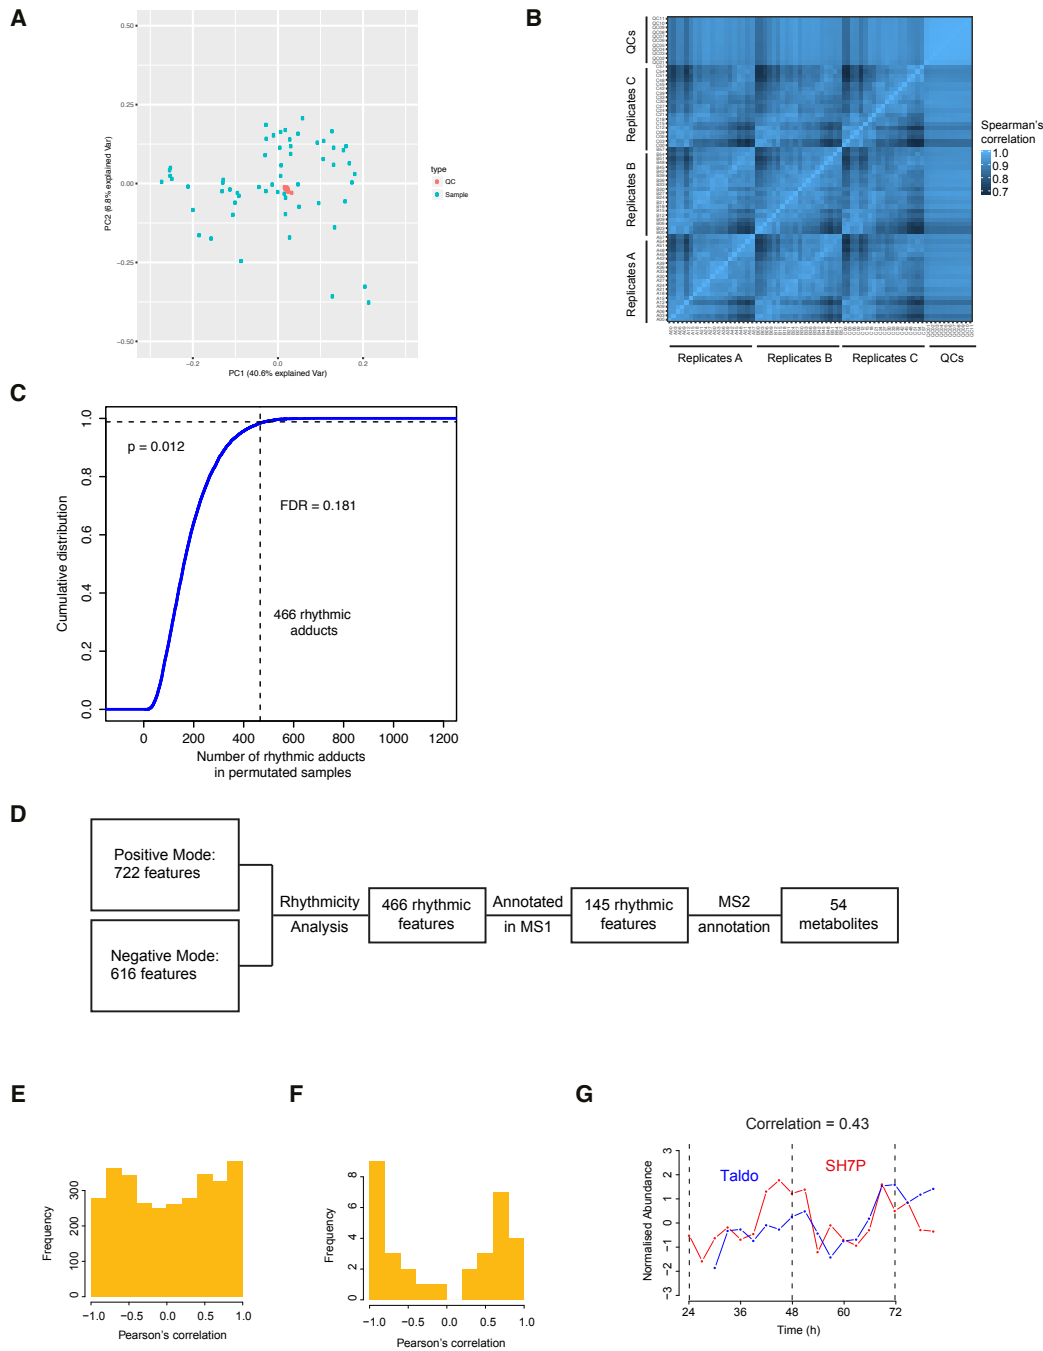

### Appendix Figure S6. Metabolomics data analysis.

**A**, PCA plot of the 59 samples and 11 quality control (QC) samples analysed in this study. **B**, Heatmap showing the Spearman's correlation between all samples. **C**, Estimation of FDR using permutation tests. The cumulative distribution of the number of rhythmic features in the 10,000 permutations is shown together with the empirical p-value and estimated FDR. **D**, Workflow of untargeted metabolomics data analysis. **E**, Distribution of Pearson's correlation coefficients for all possible protein-metabolite pairs. **F**, Distribution of Pearson's correlation coefficients for the best protein-metabolite pairs. For each metabolite, the correlation coefficients for all possible interacting

proteins were computed and the protein with the highest absolute correlation coefficient was retained.

**G,** Examples of correlated protein-metabolites are shown with Pearson correlation coefficient (top).

SH7P, sedoheptulose 7-phosphate; Taldo, Transaldolase.

A

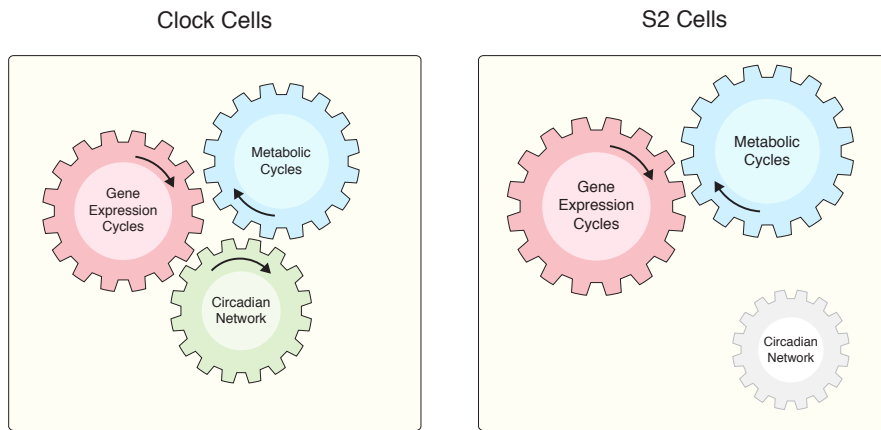

**Appendix Figure S7. Coupled gene expression and metabolic cycles in *Drosophila* S2 cells. A,** Schematic showing the difference between a clock cell where the circadian network is active and *Drosophila* S2 cells, which exhibit gene expression and metabolic cycles in its absence.

## Appendix Table S1.

Table of the 70 MS2-annotated features with m/z, retention time and fragments used for annotation.

| m/z    | Retention time (min) | Charge | Polarity | MS2 Annotation               | CAS        | KEGG   | Fragments                            |
|--------|----------------------|--------|----------|------------------------------|------------|--------|--------------------------------------|
| 132.07 | 12.17                | 1      | Positive | 3-Hydroxy-L-proline          | 4298-08-2  | C19706 | 90.06, 132.08                        |
| 136.05 | 9.78                 | 1      | Positive | Adenine                      | 73-24-5    | C00147 | 119.04, 92.02, 136.06                |
| 508.00 | 12.85                | 1      | Positive | Adenosine triphosphate       | 56-65-5    | C00002 | 136.06, 410.03, 428.04               |
| 118.09 | 10.80                | 1      | Positive | Betaine                      | 107-43-7   | C00719 | 118.09                               |
| 332.14 | 8.15                 | 1      | Positive | Ciprofloxacin                | 85721-33-1 | C05349 | 231.06, 332.14                       |
| 489.11 | 12.79                | 1      | Positive | Citicoline                   | 987-78-0   | C00307 | 264.04, 184.07                       |
| 223.07 | 13.56                | 1      | Positive | Cystathionine                | 535-34-2   | C00542 | 134.08, 223.08                       |
| 244.09 | 11.22                | 1      | Positive | Cytidine                     | 65-46-3    | C00475 | 95.02, 112.05                        |
| 324.06 | 13.27                | 1      | Positive | cytidine 5-monophosphate     | 63-37-6    | C00055 | 112.05, 324.06                       |
| 112.05 | 13.27                | 1      | Positive | Cytosine                     | 71-30-7    | C00380 | 95.02, 112.05                        |
| 112.05 | 11.22                | 1      | Positive | Cytosine                     | 71-30-7    | C00380 | 95.02, 112.05                        |
| 148.06 | 12.68                | 1      | Positive | Glutamic acid                | 56-86-0    | C00025 | 84.04, 102.06, 130.05                |
| 156.08 | 16.29                | 1      | Positive | Histidine                    | 71-00-1    | C00135 | 110.07, 113.11, 156.08               |
| 127.07 | 11.18                | 1      | Positive | Imizadoleacetic acid         | 645-65-8   |        | 81.04, 85.05                         |
| 88.11  | 10.29                | 1      | Positive | Isoamylamine                 | 107-85-7   | C02640 | 88.08, 70.07                         |
| 170.09 | 7.42                 | 1      | Positive | Methyl-L-histidiniate        | 1499-46-3  |        | 110.07, 170.09                       |
| 174.11 | 7.10                 | 1      | Positive | N-Acetyl-L-leucine           | 1188-21-2  | C02710 | 174.06                               |
| 664.12 | 12.27                | 1      | Positive | NAD                          | 53-84-9    | C00003 | 428.04, 136.06, 524.06               |
| 124.04 | 8.08                 | 1      | Positive | Niacin                       | 59-67-6    | C00253 | 124.04, 80.05, 96.04                 |
| 166.09 | 10.11                | 1      | Positive | Phenylalanine                | 63-91-2    | C00079 | 120.08, 166.09                       |
| 166.07 | 9.82                 | 1      | Positive | Phenylalanine                | 63-91-2    | C00079 | 120.08                               |
| 130.09 | 11.47                | 1      | Positive | Pipecolic Acid               | 3105-95-1  | C00408 | 84.08, 130.09                        |
| 218.14 | 9.86                 | 1      | Positive | propionylcarnitine           | 17298-37-2 | C03017 | 85.03, 218.14, 159.07                |
| 377.15 | 8.81                 | 1      | Positive | Riboflavin                   | 83-88-5    | C00255 | 243.09                               |
| 399.14 | 12.95                | 1      | Positive | S-Adenosyl-L-methionine      | 29908-03-0 | C00019 | 250.09, 298.10, 136.06               |
| 106.05 | 13.17                | 1      | Positive | Serine                       | 56-45-1    | C00065 | 60.04                                |
| 203.15 | 14.66                | 1      | Positive | Symmetric Dimethylarginine   | 30344-00-4 |        | 203.15, 116.07, 70.07, 89.09         |
| 150.11 | 8.86                 | 1      | Positive | Triethanolamine              | 102-71-6   | C06771 | 70.07, 88.08, 132.10                 |
| 183.09 | 12.33                | 1      | Positive | Triethyl phosphate           | 78-40-0    |        | 98.98, 127.02                        |
| 182.08 | 11.89                | 1      | Positive | Tyrosine                     | 60-18-4    | C00082 | 136.08, 123.04, 119.05, 91.05        |
| 296.08 | 7.13                 | 1      | Negative | 5-S-methyl-5-thioadenosine   | 2457-80-9  | C00170 | 134.05                               |
| 130.05 | 11.24                | 1      | Negative | 5-aminolevulinic acid        | 106-60-5   | C00430 | 130.09                               |
| 173.01 | 13.68                | 1      | Negative | Aconitic Acid                | 585-84-2   | C00417 | 85.03, 111.01                        |
| 505.99 | 12.85                | 1      | Negative | Adenosine triphosphate       | 56-65-5    | C00002 | 505.99, 158.92, 408.01, 176.93       |
| 88.04  | 12.70                | 1      | Negative | Alanine                      | 302-72-7   | C01401 | 88.04                                |
| 289.12 | 13.45                | 1      | Negative | Argininosuccinic acid        | 2387-71-5  | C03406 | 131.08, 132.03, 173.1                |
| 132.03 | 12.85                | 1      | Negative | Aspartic acid                | 56-84-8    | C00049 | 88.04, 71.01, 72.01                  |
| 191.02 | 13.75                | 1      | Negative | Citric acid                  | 77-92-9    | C00158 | 87.01, 111.01, 85.03                 |
| 221.06 | 13.56                | 1      | Negative | Cystathionine                | 535-34-2   | C00542 | 134.03, 120.01, 221.06               |
| 147.03 | 12.76                | 1      | Negative | D-alpha-Hydroxyglutaric acid | 2889-31-8  | C01087 | 85.03, 101.02, 57.03, 103.04, 129.02 |
| 195.05 | 12.41                | 1      | Negative | D-Gluconic acid              | 526-95-4   | C00257 | 75.01, 195.05, 129.02                |
| 171.10 | 7.09                 | 1      | Negative | Decanoic acid                | 334-48-5   | C01571 | 171.14                               |
| 171.10 | 4.44                 | 1      | Negative | Decanoic acid                | 334-48-5   | C01571 | 171.14                               |
| 171.14 | 4.16                 | 1      | Negative | Decanoic acid                | 334-48-5   | C01571 | 171.14                               |
| 121.05 | 11.20                | 1      | Negative | Erythritol                   | 149-32-6   | C00503 | 71.01, 121.03, 89.02                 |
| 259.02 | 13.43                | 1      | Negative | Glucose 6-phosphate          | 56-73-5    | C00092 | 96.97, 78.96                         |
| 129.02 | 12.76                | 1      | Negative | Glutaconic acid              | 1724-02-3  | C02214 | 85.03, 101.02                        |
| 146.05 | 12.70                | 1      | Negative | Glutamic acid                | 56-86-0    | C00025 | 102.06, 128.03, 146.05               |
| 145.06 | 12.78                | 1      | Negative | Glutamine                    | 5959-95-5  | C00819 | 101.02, 145.06, 127.05               |
| 152.53 | 12.46                | 2      | Negative | Glutathione                  | 70-18-8    | C00051 | 74.02, 128.03, 152.87, 86.02         |
| 171.01 | 12.68                | 1      | Negative | Glycerol 3-phosphate         | 57-03-4    | C03189 | 78.96, 96.97                         |
| 171.08 | 11.65                | 1      | Negative | Glycylproline                | 704-15-4   |        | 171.14, 96.96                        |
| 521.98 | 13.97                | 1      | Negative | Guanosine triphosphate       | 86-01-1    | C00044 | 521.98, 424.00                       |
| 154.06 | 16.03                | 1      | Negative | Histidine                    | 150-35-6   | C00135 | 154.06, 137.03, 93.04                |
| 103.00 | 13.03                | 1      | Negative | Malonic acid                 | 141-82-2   | C00383 | 59.01, 73.03                         |
| 181.07 | 13.89                | 1      | Negative | Mannitol                     | 69-65-8    | C00392 | 181.07, 101.02, 71.01                |
| 181.07 | 12.93                | 1      | Negative | Mannitol                     | 69-65-8    | C00392 | 181.07, 101.02, 71.01                |
| 181.07 | 14.25                | 1      | Negative | Mannitol                     | 69-65-8    | C00392 | 181.07, 101.02, 71.01                |
| 172.10 | 4.67                 | 1      | Negative | N-Acetyl-L-leucine           | 1188-21-2  | C02710 | 172.14, 130.09                       |
| 190.05 | 4.93                 | 1      | Negative | N-Acetyl-L-methionine        | 65-82-7    | C02712 | 84.04                                |
| 190.05 | 7.13                 | 1      | Negative | N-Acetyl-L-methionine        | 65-82-8    | C02713 | 84.04                                |
| 122.02 | 8.09                 | 1      | Negative | Nicotinic acid               | 59-67-6    | C00253 | 94.03, 122.02, 78.03                 |
| 164.07 | 10.12                | 1      | Negative | Phenylalanine                | 63-91-2    | C00079 | 147.04, 164.07, 72.01                |
| 166.97 | 13.49                | 1      | Negative | Phosphoenolpyruvic acid      | 138-38-9   | C00074 | 78.96                                |
| 128.07 | 11.50                | 1      | Negative | Pipecolic acid               | 535-75-1   | C00408 | 128.03                               |
| 117.02 | 12.76                | 1      | Negative | Succinic acid                | 110-15-6   | C00042 | 73.03, 117.02, 99.01                 |
| 203.08 | 11.08                | 1      | Negative | Tryptophan                   | 54-12-6    | C00806 | 203.08, 116.05, 159.09               |
| 180.07 | 11.87                | 1      | Negative | Tyrosine                     | 60-18-4    | C00082 | 180.07, 163.04, 119.05               |
| 167.02 | 11.87                | 1      | Negative | Uric Acid                    | 13154-20-6 | C00366 | 69.01, 124.01, 96.02                 |
| 151.03 | 11.20                | 1      | Negative | Xanthine                     | 69-89-6    | C00385 | 151.03, 108.02, 136.02               |

## Appendix Table S2.

Table of the 20 metabolites selected for targeted LC-MS analysis.

| m/z       | Polarity | RT Start (min) | RT End (min) | Name                                        | Abbreviation |
|-----------|----------|----------------|--------------|---------------------------------------------|--------------|
| 261.037   | Positive | 12.8           | 13.8         | Glucose 6-phosphate                         | G6P          |
| 308.0911  | Positive | 11.8           | 12.8         | Glutathione reduced                         | GSH          |
| 348.07036 | Positive | 11.5           | 12.5         | Adenosine monophosphate                     | AMP          |
| 428.0367  | Positive | 11.9           | 12.9         | Adenosine diphosphate                       | ADP          |
| 508.00304 | Positive | 12.4           | 13.4         | Adenosine triphosphate                      | ATP          |
| 613.1593  | Positive | 12.8           | 13.8         | Glutathione oxidized                        | GSSG         |
| 664.11641 | Positive | 11.1           | 12.1         | Nicotinamide adenine dinucleotide           | NAD          |
| 744.08272 | Positive | 12.4           | 13.4         | Nicotinamide adenine dinucleotide phosphate | NADP         |
| 89.02441  | Negative | 9.5            | 10.5         | Lactic acid                                 | Lac          |
| 115.0037  | Negative | 12.5           | 13.5         | Fumaric acid                                | Fum          |
| 117.01933 | Negative | 12.2           | 13.2         | Succinic acid                               | Succ         |
| 133.0143  | Negative | 12.5           | 13.5         | Malic acid                                  | Mal          |
| 145.0143  | Negative | 12.1           | 13.1         | Alphaketoglutaric acid                      | a-KG         |
| 166.9751  | Negative | 12.9           | 13.9         | Phosphoenolpyruvic acid                     | PEP          |
| 168.9908  | Negative | 12.2           | 13.2         | DHAP                                        | DHAP         |
| 191.0197  | Negative | 13.1           | 14.1         | (Iso)citrate                                | (Iso)cit     |
| 229.0119  | Negative | 12.4           | 13.4         | Ribose 5-phosphate/Ribulose 5-phosphate     | R5P/Ru5P     |
| 259.0224  | Negative | 12.8           | 13.8         | Fructose 6-phosphate                        | F6P          |
| 289.033   | Negative | 12.5           | 13.5         | Sedoheptulose 7-phosphsate                  | SH7P         |
| 338.9888  | Negative | 13             | 14           | Fructose 1,6-biphosphate                    | FBP          |
